# Supplementary material for: Innocence and noninnocence of the ligands in bis(pyrazine-2,3-dithiolate and -diselonate) d8-metal complexes. A theoretical and experimental study for the Cu(iii), Au(iii) and Ni(ii) cases
Source: Royal Society of Chemistry journal article supplement (doi:10.1039/b922626e), 2010-01-01
Supplement: b922626e.pdf [file b922626e.pdf]

**Innocence and Noninnocence of the ligands in bis(pyrazine-2,3-dithiolate and –  
diselonnate)  $d^8$ -metal complexes. A theoretical and experimental study for the  
Cu(III), Au(III) and Ni(II) cases.**

*Giuseppe Bruno, Manuel Almeida, Flavia Artizzu, João C. Dias, Maria Laura Mercuri, Luca Pilia,  
Concepció Rovira, Xavi Ribas, Angela Serpe and Paola Deplano*

**Supporting Information**

**Table S1.** Selected bond distances (Å) and angles (°) in the optimized  $[M(\text{pdt}/\text{s})_2]^z$  (M= Cu, Ni, Au; z =0, 1– or 2–) complexes

| Compounds                                                        | M-X              | X-C              | C1-C2            | C1/2-N           | C3/4-N           | C3-C4            | X-M-X          | ** |
|------------------------------------------------------------------|------------------|------------------|------------------|------------------|------------------|------------------|----------------|----|
| $[\text{Ni}(\text{pdt})]^{1-}$<br>$[\text{Ni}(\text{pdt})]^{2-}$ | 2.2008<br>2.2396 | 1.7469<br>1.7462 | 1.4326<br>1.4522 | 1.3389<br>1.3393 | 1.3392<br>1.3495 | 1.3958<br>1.3859 | 92.00<br>90.53 | B  |
| $[\text{Ni}(\text{pdt})]^{1-}$<br>$[\text{Ni}(\text{pdt})]^{2-}$ | 2.1928<br>2.2288 | 1.7386<br>1.7383 | 1.4262<br>1.4464 | 1.3332<br>1.3324 | 1.3332<br>1.3439 | 1.3884<br>1.3779 | 91.78<br>90.32 | BB |
| $[\text{Ni}(\text{pds})]^{1-}$<br>$[\text{Ni}(\text{pds})]^{2-}$ | 2.3003<br>2.3296 | 1.8786<br>1.8782 | 1.4250<br>1.4417 | 1.3365<br>1.3383 | 1.3391<br>1.3468 | 1.3954<br>1.3877 | 92.17<br>90.81 | B  |
| $[\text{Cu}(\text{pdt})]^0$<br>$[\text{Cu}(\text{pdt})]^{1-}$    | 2.2210<br>2.2377 | 1.7433<br>1.7594 | 1.4257<br>1.4293 | 1.3393<br>1.3308 | 1.3313<br>1.3463 | 1.4075<br>1.3884 | 92.96<br>91.56 | B  |
| $[\text{Cu}(\text{pdt})]^{1-}$                                   | 2.2287           | 1.7512           | 1.4229           | 1.3242           | 1.3408           | 1.3803           | 91.32          | BB |
| $[\text{Cu}(\text{pdt})]^0$<br>$[\text{Cu}(\text{pdt})]^{1-}$    | 2.2303<br>2.2433 | 1.7776<br>1.7895 | 1.4220<br>1.4271 | 1.3493<br>1.3420 | 1.3444<br>1.3584 | 1.4139<br>1.3963 | 93.77<br>92.26 | PS |
| $[\text{Cu}(\text{pds})]^{1-}$                                   | 2.3329           | 1.8868           | 1.4224           | 1.3308           | 1.3441           | 1.3897           | 91.64          | B  |
| $[\text{Cu}(\text{pds})]^{1-}$                                   | 2.3577           | 1.9023           | 1.4195           | 1.3233           | 1.3398           | 1.3812           | 91.56          | BB |
| $[\text{Cu}(\text{pds})]^0$<br>$[\text{Cu}(\text{pds})]^{1-}$    | 2.3365<br>2.3519 | 1.9022<br>1.9139 | 1.4225<br>1.4293 | 1.3511<br>1.3449 | 1.3456<br>1.3579 | 1.4121<br>1.3974 | 94.55<br>92.74 | PS |
| $[\text{Au}(\text{pdt})]^{1-}$                                   | 2.4330           | 1.8094           | 1.4365           | 1.3500           | 1.3612           | 1.4019           | 89.20          | BS |
| $[\text{Au}(\text{pds})]^{1-}$                                   | 2.5384           | 1.9318           | 1.4375           | 1.3533           | 1.3611           | 1.4029           | 89.99          | BS |
| $[\text{Au}(\text{pds})]^{1-}$                                   | 2.5689           | 1.9374           | 1.4366           | 1.3540           | 1.3601           | 1.4022           | 89.53          | BL |

\*\* Type of Calculations: B = B3LYP/6-31+G(d,p); BS= B3LYP/SDD; BB = B3LYP/6-311++G(2df,2p); BL = B3LYP/ LANL2DZ; PS = PBE1PBE/SDD

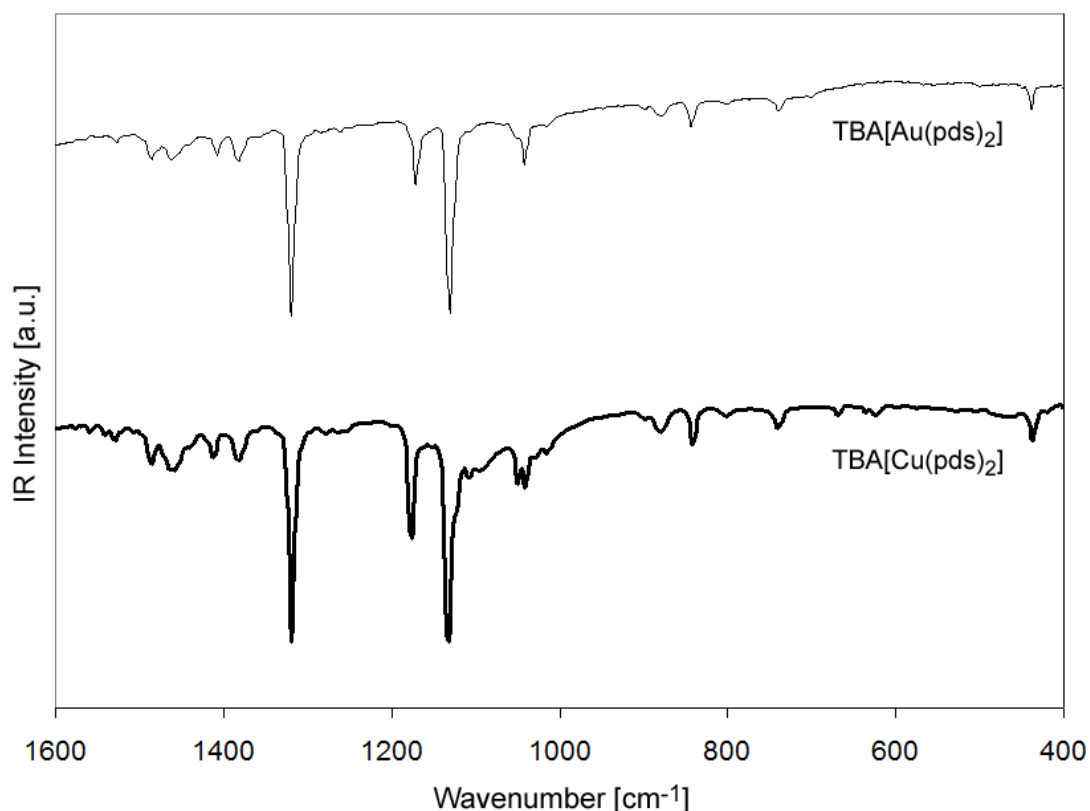

**Figure S1.** Infrared spectra of TBA[M(pds)<sub>2</sub>] (M = Cu and Au)

**Table S2.** Calculated frequencies of the most significant vibrational modes of [Cu(pdt)<sub>2</sub>]<sup>-</sup> anion.

| $\nu_{n^{\circ}}$ | $\text{cm}^{-1}$ | $I_{\text{ir}}$ | $I_{\text{Ra}}$ | Symm. | Mode Assignment                                            |
|-------------------|------------------|-----------------|-----------------|-------|------------------------------------------------------------|
| 7                 | 148              | 0               | 72              | Ag    | $\delta(\text{SMS})$                                       |
| 11                | 252              | 0               | 9               | B2g   | butterfly wag                                              |
| 14                | 333              | 0               | 35              | Ag    | $\nu(4\text{MS})$ sy                                       |
| 15                | 361              | 36              | 0               | B3u   | $\nu(2\text{MS})$ asy                                      |
| 20                | 461              | 22              | 0               | B1u   | rings(6) wag                                               |
| 31                | 811              | 0               | 55              | B1g   | $\delta(\text{CCN}) + \nu(\text{C-S})$                     |
| 32                | 838              | 0               | 12              | B2g   | H wag                                                      |
| 33                | 839              | 49              | 0               | B1u   | H wag                                                      |
| 37                | 1076             | 71              | 0               | B3u   | $\nu(\text{CC+CN}) + \delta(\text{HCC}) + \nu(\text{C-S})$ |
| 38                | 1077             | 0               | 212             | Ag    | $\nu(\text{CC+CN}) + \delta(\text{HCC}) + \nu(\text{C-S})$ |
| 40                | 1188             | 752             | 0               | B3u   | $\nu(\text{CC+CN}) + \delta(\text{HCC}) + \nu(\text{C-S})$ |
| 41                | 1195             | 0               | 148             | Ag    | $\nu(\text{CC+CN}) + \delta(\text{HCC}) + \nu(\text{C-S})$ |
| 44                | 1272             | 37              | 0               | B3u   | $\nu(\text{CC+CN}) + \delta(\text{HCC})$                   |
| 45                | 1274             | 0               | 151             | Ag    | $\nu(\text{CC+CN}) + \delta(\text{HCC})$                   |
| 46                | 1352             | 478             | 0               | B3u   | $\nu(\text{CC+CN}) + \delta(\text{HCC})$                   |
| 48                | 1451             | 0               | 12              | B1g   | $\nu(\text{CC+CN}) + \delta(\text{HCC})$                   |

|    |      |     |      |     |                          |
|----|------|-----|------|-----|--------------------------|
| 50 | 1522 | 0   | 337  | B1g | v(CN)+ $\delta$ (HCC)    |
| 51 | 1523 | 22  | 0    | B2u | v(CN)+ $\delta$ (HCC)    |
| 53 | 1573 | 0   | 186  | Ag  | v(CC+CN)+ $\delta$ (HCC) |
| 55 | 3156 | 0   | 284  | B1g | v2(CH)sym                |
| 56 | 3176 | 271 | 0    | B3u | v2(CH)asym               |
| 57 | 3177 | 0   | 1429 | Ag  | v4(CH)sym                |

**Table S3.** Calculated frequencies of the most significant vibrational modes of [Cu(pds)<sub>2</sub>]<sup>-</sup> anion.

| $\nu$ n° | cm <sup>-1</sup> | I <sub>ir.</sub> | I <sub>Ra</sub> | Symm. | Mode Assignment                       |
|----------|------------------|------------------|-----------------|-------|---------------------------------------|
| 7        | 108              | 0                | 48              | Ag    | $\delta$ (SeMSe)                      |
| 11       | 194              | 0                | 35              | Ag    | v(4MSe) sy                            |
| 12       | 227              | 0                | 8               | B2g   | butterfly wag                         |
| 16       | 284              | 8                | 0               | B3u   | v(2MSe) asy                           |
| 19       | 371              | 0                | 11              | Ag    | ring vibrations                       |
| 21       | 378              | 19               | 0               | B2u   | ring vibrations                       |
| 23       | 458              | 16               | 0               | B1u   | rings(6) wag                          |
| 31       | 787              | 0                | 48              | B1g   | $\delta$ (CCN) +v(C-Se)               |
| 32       | 842              | 0                | 6               | B2g   | H wag                                 |
| 33       | 842              | 41               | 0               | B1u   | H wag                                 |
| 36       | 1058             | 31               | 0               | B2u   | $\delta$ (CCN) +v(C-Se)               |
| 38       | 1068             | 96               | 0               | B3u   | v(CC+CN)+ $\delta$ (HCC)... + v(C-Se) |
| 39       | 1069             | 0                | 216             | Ag    | v(CC+CN)+ $\delta$ (HCC).. + v(C-Se)  |
| 40       | 1164             | 611              | 0               | B3u   | v(CC+CN)+ $\delta$ (HCC).. + v(C-Se)  |
| 41       | 1169             | 0                | 72              | Ag    | v(CC+CN)+ $\delta$ (HCC).. + v(C-Se)  |
| 44       | 1237             | 72               | 0               | B3u   | v(CC+CN)+ $\delta$ (HCC) + v(C-Se)    |
| 45       | 1240             | 0                | 140             | Ag    | v(CC+CN)+ $\delta$ (HCC) + v(C-Se)    |
| 46       | 1337             | 313              | 0               | B3u   | v(CC+CN)+ $\delta$ (HCC)              |
| 48       | 1445             | 0                | 43              | B1g   | v(CN)+ $\delta$ (HCC)                 |
| 49       | 1447             | 19               | 0               | B2u   | v(CN)+ $\delta$ (HCC)                 |
| 50       | 1509             | 0                | 322             | B1g   | v(CN)+ $\delta$ (HCC)                 |
| 51       | 1510             | 19               | 0               | B2u   | v(CN)+ $\delta$ (HCC)                 |
| 53       | 1561             | 0                | 249             | Ag    | v(CC+CN)+ $\delta$ (HCC)              |
| 54       | 3137             | 0                | 282             | B1g   | v2(CH)sym                             |
| 56       | 3158             | 266              | 0               | B3u   | v2(CH)asym                            |
| 57       | 3158             | 0                | 1516            | Ag    | v4(CH)sym                             |

**Table S4.** Calculated frequencies of the most significant vibrational modes of  $[\text{Au}(\text{pds})_2]^-$  anion.

| $\nu$ n° | $\text{cm}^{-1}$ | $I_{\text{ir}}$ | $I_{\text{Ra}}$ | Symm. | Mode Assignment                                             |
|----------|------------------|-----------------|-----------------|-------|-------------------------------------------------------------|
| 8        | 110              | 0               | 45              | Ag    | $\delta(\text{SeMSe})$                                      |
| 11       | 218              | 0               | <b>27</b>       | Ag    | $\nu(4\text{MSe})$ sy                                       |
| 12       | 219              | 7               | 0               | B2u   | $\nu(\text{MSe})$ asy                                       |
| 13       | 228              | 0               | 8               | B2g   | butterfly wag                                               |
| 15       | 242              | 15              | 0               | B3u   | $\nu(2\text{MS})$ asy                                       |
| 19       | 368              | 0               | 15              | Ag    | ring vibrations                                             |
| 21       | 385              | 25              | 0               | B2u   | $\delta(\text{SeCC})$                                       |
| 22       | 475              | 0               | 2               | B2g   | rings(6) wag                                                |
| 23       | 476              | 14              | 0               | B1u   | rings(6) wag                                                |
| 26       | 625              | 4               | 0               | B3u   | $\delta(\text{CNC})$                                        |
| 27       | 626              | 0               | 4               | Ag    | $\delta(\text{CNC})$                                        |
| 29       | 790              | 0               | 65              | B1g   | $\delta(\text{CCN}) + \nu(\text{C-Se})$                     |
| 33       | 870              | 69              | 0               | B1u   | H wag                                                       |
| 38       | 1069             | 89              | 0               | B3u   | $\nu(\text{CC+CN}) + \delta(\text{HCC})$                    |
| 39       | 1070             | 0               | 224             | Ag    | $\nu(\text{CC+CN}) + \delta(\text{HCC}) + \nu(\text{C-Se})$ |
| 40       | 1191             | 596             | 0               | B3u   | $\nu(\text{CC+CN}) + \delta(\text{HCC}) + \nu(\text{C-Se})$ |
| 41       | 1196             | 0               | 73              | Ag    | $\nu(\text{CC+CN}) + \delta(\text{HCC}) + \nu(\text{C-Se})$ |
| 44       | 1268             | 10              | 0               | B3u   | $\nu(\text{CC+CN}) + \delta(\text{HCC})$                    |
| 45       | 1269             | 0               | 3               | Ag    | $\nu(\text{CC+CN}) + \delta(\text{HCC})$                    |
| 46       | 1358             | 400             | 0               | B3u   | $\nu(\text{CC+CN}) + \delta(\text{HCC})$                    |
| 47       | 1361             | 0               | 14              | Ag    | $\nu(\text{CC+CN}) + \delta(\text{HCC})$                    |
| 48       | 1440             | 0               | 20              | B1g   | $\nu(\text{CC+CN}) + \delta(\text{HCC})$                    |
| 49       | 1441             | 42              | 0               | B2u   | $\nu(\text{CC+CN}) + \delta(\text{HCC})$                    |
| 50       | 1534             | 27              | 0               | B2u   | $\nu(\text{CN}) + \delta(\text{HCC})$                       |
| 51       | 1535             | 0               | 336             | B1g   | $\nu(\text{CN}) + \delta(\text{HCC})$                       |
| 52       | 1556             | 4               | 0               | B3u   | $\nu(\text{CC+CC}) + \delta(\text{HCC})$                    |
| 53       | 1557             | 0               | 135             | Ag    | $\nu(\text{CC+CN}) + \delta(\text{HCC})$                    |
| 55       | 3235             | 0               | 185             | B1g   | $\nu_2(\text{CH})_{\text{sym}}$                             |
| 56       | 3262             | 213             | 0               | B3u   | $\nu_2(\text{CH})_{\text{asym}}$                            |
| 57       | 3262             | 0               | 1036            | Ag    | $\nu_4(\text{CH})_{\text{sym}}$                             |

**Table S5.** IR<sup>a</sup> and Raman<sup>b</sup> peaks (cm<sup>-1</sup>) of (Bu<sub>4</sub>N)[Cu(pdt)<sub>2</sub>].

| IR                       |                                       | RAMAN                    |                                       | Symmetry | Assignments                  |
|--------------------------|---------------------------------------|--------------------------|---------------------------------------|----------|------------------------------|
| $\bar{\nu}_{\text{obs}}$ | $\bar{\nu}_{\text{calc}}$ (Intensity) | $\bar{\nu}_{\text{obs}}$ | $\bar{\nu}_{\text{calc}}$ (Intensity) |          |                              |
| 1330s                    | 1352 (478)                            | 1535m                    | 1522 (337)                            | B1g      | v(CN)+ $\delta$ (HCC)        |
|                          |                                       | 1332ms                   |                                       | B3u      | v(CC+CN)+ $\delta$ (HCC)     |
| 1191mw<br>1143s<br>1061w | 1188(752)                             | not obs.                 | 1274(151)                             | Ag       | v(CC+CN)+ $\delta$ (HCC)     |
|                          |                                       | 1199ms                   | 1195(148)                             | Ag       | v(CC+CN+CS) + $\delta$ (HCC) |
|                          |                                       |                          |                                       | B3u      | v(CC+CN+CS) + $\delta$ (HCC) |
| 831w                     | 839 (49)                              | 1040w                    | 1077(212)                             | B3u      | v(CC+CN+CS) + $\delta$ (HCC) |
|                          |                                       |                          |                                       | Ag       | v(CC+CN+CS) + $\delta$ (HCC) |
| 480mw<br>442mw<br>381mw  | 461(22)                               | not obs.                 | 811(55)                               | B1u      | Hwag                         |
|                          |                                       | 489w                     |                                       | B1g      | $\delta$ (CCN)+ v(CS)        |
| 381mw                    | 361(36)                               |                          |                                       | B1u      | Ring wag                     |
|                          |                                       | 344s                     | 333(35)                               | B3u      | v <sub>as</sub> (2CuS)       |
|                          |                                       | 223 w                    | 252(9)                                | Ag       | v <sub>s</sub> (4CuS)        |
|                          |                                       | 122s                     | 148(72)                               | B2g      | Butterfly wag                |
|                          |                                       |                          |                                       | Ag       | $\delta$ (SCuS)              |

<sup>a</sup> Spectra recorded on KBr pellets. <sup>b</sup> Spectra recorded on solid samples mixed with KBr.

**Table S6.** IR<sup>a</sup> and Raman<sup>b</sup> peaks (cm<sup>-1</sup>) of (Bu<sub>4</sub>N)[Cu(pds)<sub>2</sub>].

| IR                       |                                       | RAMAN                    |                                       | Symmetry | Assignments                   |
|--------------------------|---------------------------------------|--------------------------|---------------------------------------|----------|-------------------------------|
| $\bar{\nu}_{\text{obs}}$ | $\bar{\nu}_{\text{calc}}$ (Intensity) | $\bar{\nu}_{\text{obs}}$ | $\bar{\nu}_{\text{calc}}$ (Intensity) |          |                               |
| 1318s                    | 1337 (313)                            | 1470w                    | 1445 (43)                             | B1g      | v(CN)+ $\delta$ (HCC)         |
|                          |                                       | 1412w                    |                                       | B3u      | v(CC+CN)+ $\delta$ (HCC)      |
| 1177m                    | 1164 (611)                            | 1320w                    |                                       | Ag       | v(CC+CN+CSe) + $\delta$ (HCC) |
|                          |                                       | not obs.                 | 1240 (140)                            | Ag       | v(CC+CN+CSe) + $\delta$ (HCC) |
|                          |                                       | 1179m                    | 1169 (72)                             | B3u      | v(CC+CN+CSe) + $\delta$ (HCC) |
| 1133s<br>1049,<br>1041w  | 1068 (96)<br>1058 (31)                | 1155m                    |                                       |          |                               |
|                          |                                       |                          |                                       | B3u      | v(CC+CN+CSe) + $\delta$ (HCC) |
| 841w                     | 842 (41)                              | 1050m                    | 1069 (216)                            | B2u      | v(CSe) + $\delta$ (CCN)       |
|                          |                                       |                          |                                       | Ag       | v(CC+CN+CSe) + $\delta$ (HCC) |
| 437mw<br>378mw           | 458 (16)<br>378 (19)                  | not obs.                 | 749 (48)                              | B1u      | Hwag                          |
|                          |                                       | 489w                     |                                       | B1g      | $\delta$ (CCN)+ v(CSe)        |
| 378mw                    | 378 (19)                              |                          |                                       | B1u      | Ring wag                      |
|                          |                                       |                          |                                       | B3u      | v <sub>as</sub> (2CuSe)       |
|                          |                                       | 198s                     | 227 (48)                              | B2g      | Butterfly wag                 |
|                          |                                       | 162m                     | 194 (35)                              | Ag       | v <sub>s</sub> (4CuSe)        |
|                          |                                       | 117vs                    | 108 (48)                              | Ag       | $\delta$ (SeCuSe)             |

<sup>a</sup> Spectra recorded on KBr pellets. <sup>b</sup> Spectra recorded on solid samples mixed with KBr.

**Table S7.** IR<sup>a</sup> and Raman<sup>b</sup> peaks (cm<sup>-1</sup>) of (Bu<sub>4</sub>N)[Au(pds)<sub>2</sub>]

| IR                       |                                       | RAMAN                    |                                       | Symmetry | Assignments             |
|--------------------------|---------------------------------------|--------------------------|---------------------------------------|----------|-------------------------|
| $\bar{\nu}_{\text{obs}}$ | $\bar{\nu}_{\text{calc}}$ (Intensity) | $\bar{\nu}_{\text{obs}}$ | $\bar{\nu}_{\text{calc}}$ (Intensity) |          |                         |
|                          |                                       | 1527w                    | 1535 (336)                            | B1g      | v(CN)+ δ(HCC)           |
|                          |                                       | 1477m                    | 1440 (20)                             | B1g      | v(CC+CN)+ δ(HCC)        |
| 1319s                    | 1358 (400)                            |                          |                                       | B3u      | v(CC+CN)+ δ(HCC)        |
|                          |                                       | 1172mw                   | 1196 (73)                             | Ag       | v(CC+CN+CSe) + δ(HCC)   |
|                          |                                       | 1134mw                   |                                       |          |                         |
| 1171m                    | 1191 (596)                            |                          |                                       | B3u      | v(CC+CN+CSe) + δ(HCC)   |
| 1131s                    |                                       |                          |                                       |          |                         |
| 1042w                    | 1069 (89)                             |                          |                                       | B3u      | v(CC+CN) + δ(HCC)       |
|                          |                                       | 1050m                    | 1070 (224)                            | Ag       | v(CC+CN+CSe) + δ(HCC)   |
| 879w                     | 870 (69)                              |                          |                                       | B1u      | Hwag                    |
| 843w                     |                                       |                          |                                       |          |                         |
|                          |                                       | 772w                     | 790 (65)                              | B1g      | δ(CCN)+ v(CSe)          |
| 438mw                    | 476 (14)                              |                          |                                       | B1u      | Ring wag                |
|                          |                                       |                          |                                       |          |                         |
| 382mw                    | 385 (25)                              |                          |                                       | B2u      | δ(SeCC)                 |
| 350s                     |                                       |                          |                                       |          |                         |
| not obs.                 | 242 (15)                              |                          |                                       | B3u      | v <sub>as</sub> (2AuSe) |
|                          |                                       | 258m                     |                                       |          |                         |
|                          |                                       | 225ms                    | 228 (8)                               | B2g      | Butterfly wag           |
|                          |                                       | 179m                     | 218 (27)                              | Ag       | v <sub>s</sub> (4AuSe)  |
|                          |                                       | 116vs                    | 110 (45)                              | Ag       | δ(SeAuSe)               |

<sup>a</sup> Spectra recorded on KBr pellets. <sup>b</sup> Spectra recorded on a single crystal.

**Table S8.** Drawing, relative energy and symmetries of the most significant orbitals of [Cu(pdt/s)]<sup>-</sup> obtained by DFT calculations.

|            | [Cu(pdt) <sub>2</sub> ] <sup>-1</sup>                                               | E(eV) |      | [Cu(pds) <sub>2</sub> ] <sup>-1</sup>                                                |             |      | E(eV)  |
|------------|-------------------------------------------------------------------------------------|-------|------|--------------------------------------------------------------------------------------|-------------|------|--------|
| MO#n       |                                                                                     | **    | Symm |                                                                                      | MO#n        | Symm | **     |
| LUMO+2 #90 |  | .060  | B2g  |  | LUMO+2 #126 | B1u  | .049   |
| LUMO+1 #89 |  | .054  | B1u  |  | LUMO+1 #125 | B1u  | .049   |
| LUMO #88   |  | -.008 | B1g  |  | LUMO #124   | B1g  | -.005  |
| HOMO #87   |  | -.101 | B2g  |  | HOMO #123   | B2g  | -0.099 |
| HOMO-1 #86 |  | -.133 | B1u  |  | HOMO-1 #122 | Au   | -.127  |

|               |                                                                                   |      |            |                                                                                    |             |     |      |
|---------------|-----------------------------------------------------------------------------------|------|------------|------------------------------------------------------------------------------------|-------------|-----|------|
| HOMO-2<br>#85 | 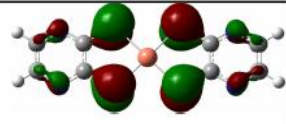 | -143 | <u>Au</u>  |  | HOMO-2 #121 | B1u | -132 |
| HOMO-3<br>#84 |  | -149 | B3g        |  | HOMO-3 #120 | B3g | -136 |
| HOMO-4<br>#83 |  | -153 | B3u        |  | HOMO-4 #119 | B2u | -143 |
| HOMO-5<br>#82 |  | -156 | B2u        |  | HOMO-5 #118 | B3u | -152 |
| HOMO-6<br>#81 |  | -157 | Ag         |  | HOMO-6 #117 | Ag  | -158 |
| HOMO-7<br>#80 |  | -188 | <u>B3u</u> |  | HOMO-7 #116 | B3u | -174 |

|               |                                                                                     |      |     |                                                                                      |             |     |      |
|---------------|-------------------------------------------------------------------------------------|------|-----|--------------------------------------------------------------------------------------|-------------|-----|------|
| HOMO-8<br>#79 | 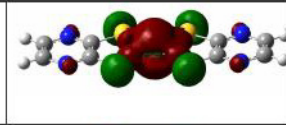 | -218 | Ag  |  | HOMO-8 #115 | Ag  | -210 |
| HOMO-9<br>#78 |  | -218 | B2g |  | HOMO-9 #114 | B2g | -212 |

\*\* E da OPT PBE1PBE/6-311++G(2df,2p)



**Table S9.** Drawing, relative energy and symmetries of the most significant orbitals of  $[\text{Au}(\text{pdt/s})]^-$  obtained by DFT calculations.

|            | $[\text{Au}(\text{pdt})_2]^-$                                                       | E(eV) | Symm | $[\text{Au}(\text{pds})_2]^-$                                                        |            |      | E(eV)  |
|------------|-------------------------------------------------------------------------------------|-------|------|--------------------------------------------------------------------------------------|------------|------|--------|
| MO#n       |                                                                                     | **    | Symm |                                                                                      | MO#n       | Symm | **     |
| LUMO+2 #85 | 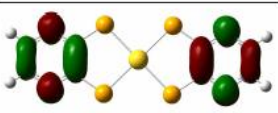   | .052  | B2g  |    | LUMO+2 #65 | B1u  | .048   |
| LUMO+1 #84 |    | .049  | B1u  |    | LUMO+1 #64 | B1u  | .045   |
| LUMO #83   |    | .000  | B1g  |    | LUMO #63   | B1g  | .004   |
| HOMO #82   |    | -108  | B2g  |    | HOMO #62   | B2g  | -0.100 |
| HOMO-1 #81 |    | -138  | B1u  |    | HOMO-1 #61 | B3g  | -131   |
| HOMO-2 #80 |  | -146  | B3g  |  | HOMO-2 #60 | B1u  | -132   |
| HOMO-3 #79 |  | -153  | Au   |  | HOMO-3 #59 | Au   | -134   |
| HOMO-4 #78 |  | -155  | B3u  |  | HOMO-4 #58 | B2u  | -151   |
| HOMO-5 #77 |  | -156  | Ag   |  | HOMO-5 #57 | B3u  | -152   |
| HOMO-6 #76 |  | -163  | B2u  |  | HOMO-6 #56 | Ag   | -155   |
| HOMO-7 #75 |  | -190  | B3u  |  | HOMO-7 #55 | B3u  | -174   |

|                |                                                                                   |       |     |                                                                                    |              |     |       |
|----------------|-----------------------------------------------------------------------------------|-------|-----|------------------------------------------------------------------------------------|--------------|-----|-------|
| HOMO-8<br>#74  | 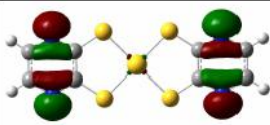 | -.218 | B1g |  | HOMO-8 #54   | Ag  | -.217 |
| HOMO-9<br>#73  |  | -.220 | B2u |  | HOMO-9 #53   | B2g | -.218 |
| HOMO-10<br>#72 |  | -.221 | Ag  |  | HOMO-10 #52  | B1g | -.220 |
| HOMO-11<br>#71 |  | -.224 | B2g |  | HOMO-11 #51  | B2u | -.221 |
| HOMO-12<br>#70 |  | -.237 | B1u |  | HOMO-121 #50 | B1u | -.227 |

\*\* E da OPT PBE1PBE/SDD

**Table S10.** Drawing, relative energy and symmetries of the most significant orbitals of  $[\text{Ni}(\text{pdt}/\text{s})_2]^{2-}$  obtained by DFT calculations.

|               | $[\text{Ni}(\text{pdt})_2]^-$ | E(eV)    |      | $[\text{Ni}(\text{pds})_2]^{2-}$ |                |      | E(eV)    |
|---------------|-------------------------------|----------|------|----------------------------------|----------------|------|----------|
| MO#n          |                               | **       | Symm |                                  | MO#n           | Symm | **       |
| LUMO+9<br>#97 |                               | 0.21162  | Au   |                                  | LUMO+n<br>#131 | Au   | 0.20078  |
| LUMO+6<br>#94 |                               | 0.18827  | B2g  |                                  | LUMO+n<br>#130 | B2g  | 0.17659  |
| LUMO+4<br>#92 |                               | 0.17982  | B1u  |                                  | LUMO+2<br>#126 | B1u  | 0.17088  |
| LUMO #88      |                               | 0.15173  | Ag   |                                  | LUMO<br>#124   | B3u  | 0.14854  |
| HOMO #87      |                               | 0.04995  | B2g  |                                  | HOMO #123      | B2g  | 0.04602  |
| HOMO-1<br>#86 |                               | 0.01980  | B1g  |                                  | HOMO-1<br>#122 | B1g  | 0.02263  |
| HOMO-2<br>#85 |                               | 0.01001  | Ag   |                                  | HOMO-2<br>#121 | Ag   | 0.00994  |
| HOMO-3<br>#84 |                               | 0.00701  | B1u  |                                  | HOMO-3<br>#120 | Au   | 0.00777  |
| HOMO-4<br>#83 |                               | -0.00309 | Au   |                                  | HOMO-4<br>#119 | B1u  | 0.00187  |
| HOMO-5<br>#82 |                               | -0.00608 | B2u  |                                  | HOMO-5<br>#118 | B2u  | 0.00064  |
| HOMO-6<br>#81 |                               | -0.01990 | Ag   |                                  | HOMO-6<br>#117 | Ag   | -0.02225 |
| HOMO-7<br>#80 |                               | -0.02263 | B3u  |                                  | HOMO-7<br>#116 | B2g  | -0.02776 |
| HOMO-9<br>#78 |                               | -0.04120 | B3u  |                                  |                |      |          |

**Table S11.** Cartesian coordinates for  $[M(\text{pdt}/\text{s})_2]^z$  ( $z = 0, 1-, 2-$ ;  $M = \text{Ni}, \text{Cu}, \text{Au}$ ).

**[Ni(pdt)<sub>2</sub>]<sup>0</sup>**      E(au)=-3626.18733      PBE1PBE/6-311++G(2df,2p)

---

| Center Number | Atomic Number | Atomic Type | Coordinates (Angstroms) |           |           |
|---------------|---------------|-------------|-------------------------|-----------|-----------|
|               |               |             | X                       | Y         | Z         |
| 1             | 6             | 0           | 0.000000                | 0.705700  | 5.198629  |
| 2             | 6             | 0           | 0.000000                | 0.710830  | 2.943081  |
| 3             | 6             | 0           | 0.000000                | -0.710830 | 2.943081  |
| 4             | 6             | 0           | 0.000000                | -0.705700 | 5.198629  |
| 5             | 1             | 0           | 0.000000                | 1.253931  | 6.135336  |
| 6             | 1             | 0           | 0.000000                | -1.253931 | 6.135336  |
| 7             | 16            | 0           | 0.000000                | -1.554663 | 1.464001  |
| 8             | 16            | 0           | 0.000000                | 1.554663  | 1.464001  |
| 9             | 1             | 0           | 0.000000                | -1.253931 | -6.135336 |
| 10            | 6             | 0           | 0.000000                | -0.705700 | -5.198629 |
| 11            | 6             | 0           | 0.000000                | 0.705700  | -5.198629 |
| 12            | 1             | 0           | 0.000000                | 1.253931  | -6.135336 |
| 13            | 6             | 0           | 0.000000                | -0.710830 | -2.943081 |
| 14            | 6             | 0           | 0.000000                | 0.710830  | -2.943081 |
| 15            | 16            | 0           | 0.000000                | -1.554663 | -1.464001 |
| 16            | 16            | 0           | 0.000000                | 1.554663  | -1.464001 |
| 17            | 7             | 0           | 0.000000                | -1.405771 | 4.091340  |
| 18            | 7             | 0           | 0.000000                | 1.405771  | 4.091340  |
| 19            | 7             | 0           | 0.000000                | -1.405771 | -4.091340 |
| 20            | 7             | 0           | 0.000000                | 1.405771  | -4.091340 |
| 21            | 28            | 0           | 0.000000                | 0.000000  | 0.000000  |

**[Ni(pdt)<sub>2</sub>]<sup>1-</sup>**      E(au)=-3626.32957      PBE1PBE/6-311++G(2df,2p)

---

| Center Number | Atomic Number | Atomic Type | Coordinates (Angstroms) |           |           |
|---------------|---------------|-------------|-------------------------|-----------|-----------|
|               |               |             | X                       | Y         | Z         |
| 1             | 6             | 0           | 0.000000                | 0.692631  | 5.270232  |
| 2             | 6             | 0           | 0.000000                | 0.710499  | 3.007123  |
| 3             | 6             | 0           | 0.000000                | -0.710499 | 3.007123  |
| 4             | 6             | 0           | 0.000000                | -0.692631 | 5.270232  |
| 5             | 1             | 0           | 0.000000                | 1.251144  | 6.201627  |
| 6             | 1             | 0           | 0.000000                | -1.251144 | 6.201627  |
| 7             | 16            | 0           | 0.000000                | -1.558152 | 1.501195  |
| 8             | 16            | 0           | 0.000000                | 1.558152  | 1.501195  |
| 9             | 1             | 0           | 0.000000                | -1.251144 | -6.201627 |
| 10            | 6             | 0           | 0.000000                | -0.692631 | -5.270232 |
| 11            | 6             | 0           | 0.000000                | 0.692631  | -5.270232 |
| 12            | 1             | 0           | 0.000000                | 1.251144  | -6.201627 |
| 13            | 6             | 0           | 0.000000                | -0.710499 | -3.007123 |
| 14            | 6             | 0           | 0.000000                | 0.710499  | -3.007123 |
| 15            | 16            | 0           | 0.000000                | -1.558152 | -1.501195 |
| 16            | 16            | 0           | 0.000000                | 1.558152  | -1.501195 |
| 17            | 7             | 0           | 0.000000                | -1.396977 | 4.143306  |
| 18            | 7             | 0           | 0.000000                | 1.396977  | 4.143306  |
| 19            | 7             | 0           | 0.000000                | -1.396977 | -4.143306 |
| 20            | 7             | 0           | 0.000000                | 1.396977  | -4.143306 |
| 21            | 28            | 0           | 0.000000                | 0.000000  | 0.000000  |

**[Ni(pdt)<sub>2</sub>]<sup>2-</sup>**      E(au)=-3626.31632      PBE1PBE/6-311++G(2df,2p)

| Center<br>Number | Atomic<br>Number | Atomic<br>Type | Coordinates (Angstroms) |           |           |
|------------------|------------------|----------------|-------------------------|-----------|-----------|
|                  |                  |                | X                       | Y         | Z         |
| 1                | 6                | 0              | 0.000000                | 0.687605  | 5.326481  |
| 2                | 6                | 0              | 0.000000                | 0.720710  | 3.049469  |
| 3                | 6                | 0              | 0.000000                | -0.720710 | 3.049469  |
| 4                | 6                | 0              | 0.000000                | -0.687605 | 5.326481  |
| 5                | 1                | 0              | 0.000000                | 1.248088  | 6.259759  |
| 6                | 1                | 0              | 0.000000                | -1.248088 | 6.259759  |
| 7                | 16               | 0              | 0.000000                | -1.563955 | 1.543259  |
| 8                | 16               | 0              | 0.000000                | 1.563955  | 1.543259  |
| 9                | 1                | 0              | 0.000000                | -1.248088 | -6.259759 |
| 10               | 6                | 0              | 0.000000                | -0.687605 | -5.326481 |
| 11               | 6                | 0              | 0.000000                | 0.687605  | -5.326481 |
| 12               | 1                | 0              | 0.000000                | 1.248088  | -6.259759 |
| 13               | 6                | 0              | 0.000000                | -0.720710 | -3.049469 |
| 14               | 6                | 0              | 0.000000                | 0.720710  | -3.049469 |
| 15               | 16               | 0              | 0.000000                | -1.563955 | -1.543259 |
| 16               | 16               | 0              | 0.000000                | 1.563955  | -1.543259 |
| 17               | 7                | 0              | 0.000000                | -1.398257 | 4.191540  |
| 18               | 7                | 0              | 0.000000                | 1.398257  | 4.191540  |
| 19               | 7                | 0              | 0.000000                | -1.398257 | -4.191540 |
| 20               | 7                | 0              | 0.000000                | 1.398257  | -4.191540 |
| 21               | 28               | 0              | 0.000000                | 0.000000  | 0.000000  |

**[Ni(pds)<sub>2</sub>]<sup>0</sup>**      E(au)=-11638.85065      PBE1PBE/6-311++G(2df,2p)

| Center<br>Number | Atomic<br>Number | Atomic<br>Type | Coordinates (Angstroms) |           |           |
|------------------|------------------|----------------|-------------------------|-----------|-----------|
|                  |                  |                | X                       | Y         | Z         |
| 1                | 6                | 0              | 0.000000                | 0.702904  | 5.389202  |
| 2                | 6                | 0              | 0.000000                | 0.706890  | 3.131093  |
| 3                | 6                | 0              | 0.000000                | -0.706890 | 3.131093  |
| 4                | 6                | 0              | 0.000000                | -0.702904 | 5.389202  |
| 5                | 1                | 0              | 0.000000                | 1.255150  | 6.323290  |
| 6                | 1                | 0              | 0.000000                | -1.255150 | 6.323290  |
| 7                | 1                | 0              | 0.000000                | -1.255150 | -6.323290 |
| 8                | 6                | 0              | 0.000000                | -0.702904 | -5.389202 |
| 9                | 6                | 0              | 0.000000                | 0.702904  | -5.389202 |
| 10               | 1                | 0              | 0.000000                | 1.255150  | -6.323290 |
| 11               | 6                | 0              | 0.000000                | -0.706890 | -3.131093 |
| 12               | 6                | 0              | 0.000000                | 0.706890  | -3.131093 |
| 13               | 7                | 0              | 0.000000                | -1.399123 | 4.276077  |
| 14               | 7                | 0              | 0.000000                | 1.399123  | 4.276077  |
| 15               | 7                | 0              | 0.000000                | -1.399123 | -4.276077 |
| 16               | 7                | 0              | 0.000000                | 1.399123  | -4.276077 |
| 17               | 34               | 0              | 0.000000                | -1.651797 | 1.533969  |
| 18               | 34               | 0              | 0.000000                | 1.651797  | 1.533969  |
| 19               | 34               | 0              | 0.000000                | -1.651797 | -1.533969 |
| 20               | 34               | 0              | 0.000000                | 1.651797  | -1.533969 |
| 21               | 28               | 0              | 0.000000                | 0.000000  | 0.000000  |

**[Ni(pds)<sub>2</sub>]<sup>1-</sup>**                      E(au)=-11638.99390                      PBE1PBE/6-311++G(2df,2p)

| Center<br>Number | Atomic<br>Number | Atomic<br>Type | Coordinates (Angstroms) |           |           |
|------------------|------------------|----------------|-------------------------|-----------|-----------|
|                  |                  |                | X                       | Y         | Z         |
| 1                | 6                | 0              | 0.000000                | 0.691156  | 5.476905  |
| 2                | 6                | 0              | 0.000000                | 0.707730  | 3.212272  |
| 3                | 6                | 0              | 0.000000                | -0.707730 | 3.212272  |
| 4                | 6                | 0              | 0.000000                | -0.691156 | 5.476905  |
| 5                | 1                | 0              | 0.000000                | 1.253307  | 6.405798  |
| 6                | 1                | 0              | 0.000000                | -1.253307 | 6.405798  |
| 7                | 1                | 0              | 0.000000                | -1.253307 | -6.405798 |
| 8                | 6                | 0              | 0.000000                | -0.691156 | -5.476905 |
| 9                | 6                | 0              | 0.000000                | 0.691156  | -5.476905 |
| 10               | 1                | 0              | 0.000000                | 1.253307  | -6.405798 |
| 11               | 6                | 0              | 0.000000                | -0.707730 | -3.212272 |
| 12               | 6                | 0              | 0.000000                | 0.707730  | -3.212272 |
| 13               | 7                | 0              | 0.000000                | -1.392166 | 4.345534  |
| 14               | 7                | 0              | 0.000000                | 1.392166  | 4.345534  |
| 15               | 7                | 0              | 0.000000                | -1.392166 | -4.345534 |
| 16               | 7                | 0              | 0.000000                | 1.392166  | -4.345534 |
| 17               | 34               | 0              | 0.000000                | -1.655590 | 1.588723  |
| 18               | 34               | 0              | 0.000000                | 1.655590  | 1.588723  |
| 19               | 34               | 0              | 0.000000                | -1.655590 | -1.588723 |
| 20               | 34               | 0              | 0.000000                | 1.655590  | -1.588723 |
| 21               | 28               | 0              | 0.000000                | 0.000000  | 0.000000  |

**[Ni(pds)<sub>2</sub>]<sup>2-</sup>**                      E(au)=-11638.97947                      PBE1PBE/6-311++G(2df,2p)

| Center<br>Number | Atomic<br>Number | Atomic<br>Type | Coordinates (Angstroms) |           |           |
|------------------|------------------|----------------|-------------------------|-----------|-----------|
|                  |                  |                | X                       | Y         | Z         |
| 1                | 6                | 0              | 0.000000                | 0.688018  | 5.525754  |
| 2                | 6                | 0              | 0.000000                | 0.717368  | 3.249015  |
| 3                | 6                | 0              | 0.000000                | -0.717368 | 3.249015  |
| 4                | 6                | 0              | 0.000000                | -0.688018 | 5.525754  |
| 5                | 1                | 0              | 0.000000                | 1.250156  | 6.457755  |
| 6                | 1                | 0              | 0.000000                | -1.250156 | 6.457755  |
| 7                | 1                | 0              | 0.000000                | -1.250156 | -6.457755 |
| 8                | 6                | 0              | 0.000000                | -0.688018 | -5.525754 |
| 9                | 6                | 0              | 0.000000                | 0.688018  | -5.525754 |
| 10               | 1                | 0              | 0.000000                | 1.250156  | -6.457755 |
| 11               | 6                | 0              | 0.000000                | -0.717368 | -3.249015 |
| 12               | 6                | 0              | 0.000000                | 0.717368  | -3.249015 |
| 13               | 7                | 0              | 0.000000                | -1.394293 | 4.389693  |
| 14               | 7                | 0              | 0.000000                | 1.394293  | 4.389693  |
| 15               | 7                | 0              | 0.000000                | -1.394293 | -4.389693 |
| 16               | 7                | 0              | 0.000000                | 1.394293  | -4.389693 |
| 17               | 34               | 0              | 0.000000                | -1.654700 | 1.622950  |
| 18               | 34               | 0              | 0.000000                | 1.654700  | 1.622950  |
| 19               | 34               | 0              | 0.000000                | -1.654700 | -1.622950 |
| 20               | 34               | 0              | 0.000000                | 1.654700  | -1.622950 |
| 21               | 28               | 0              | 0.000000                | 0.000000  | 0.000000  |



**[Cu(pdt)<sub>2</sub>]<sup>0</sup>**      E(au)=-3758.35136      PBE1PBE/6-311++G(2df,2p)

---

| Center<br>Number | Atomic<br>Number | Atomic<br>Type | Coordinates (Angstroms) |           |           |
|------------------|------------------|----------------|-------------------------|-----------|-----------|
|                  |                  |                | X                       | Y         | Z         |
| 1                | 6                | 0              | 0.000000                | 0.699514  | 5.232314  |
| 2                | 6                | 0              | 0.000000                | 0.707578  | 2.975482  |
| 3                | 6                | 0              | 0.000000                | -0.707578 | 2.975482  |
| 4                | 6                | 0              | 0.000000                | -0.699514 | 5.232314  |
| 5                | 1                | 0              | 0.000000                | 1.255615  | 6.163500  |
| 6                | 1                | 0              | 0.000000                | -1.255615 | 6.163500  |
| 7                | 16               | 0              | 0.000000                | -1.586793 | 1.494446  |
| 8                | 16               | 0              | 0.000000                | 1.586793  | 1.494446  |
| 9                | 1                | 0              | 0.000000                | -1.255615 | -6.163500 |
| 10               | 6                | 0              | 0.000000                | -0.699514 | -5.232314 |
| 11               | 6                | 0              | 0.000000                | 0.699514  | -5.232314 |
| 12               | 1                | 0              | 0.000000                | 1.255615  | -6.163500 |
| 13               | 6                | 0              | 0.000000                | -0.707578 | -2.975482 |
| 14               | 6                | 0              | 0.000000                | 0.707578  | -2.975482 |
| 15               | 16               | 0              | 0.000000                | -1.586793 | -1.494446 |
| 16               | 16               | 0              | 0.000000                | 1.586793  | -1.494446 |
| 17               | 29               | 0              | 0.000000                | 0.000000  | 0.000000  |
| 18               | 7                | 0              | 0.000000                | -1.397466 | 4.112357  |
| 19               | 7                | 0              | 0.000000                | 1.397466  | 4.112357  |
| 20               | 7                | 0              | 0.000000                | -1.397466 | -4.112357 |
| 21               | 7                | 0              | 0.000000                | 1.397466  | -4.112357 |

---

**[Cu(pdt)<sub>2</sub>]<sup>1-</sup>**      E(au)=-3758.49724      PBE1PBE/6-311++G(2df,2p)

---

| Center<br>Number | Atomic<br>Number | Atomic<br>Type | Coordinates (Angstroms) |           |           |
|------------------|------------------|----------------|-------------------------|-----------|-----------|
|                  |                  |                | X                       | Y         | Z         |
| 1                | 6                | 0              | 0.000000                | 0.689014  | 5.297961  |
| 2                | 6                | 0              | 0.000000                | 0.709351  | 3.033419  |
| 3                | 6                | 0              | 0.000000                | -0.709351 | 3.033419  |
| 4                | 6                | 0              | 0.000000                | -0.689014 | 5.297961  |
| 5                | 1                | 0              | 0.000000                | 1.252063  | 6.226011  |
| 6                | 1                | 0              | 0.000000                | -1.252063 | 6.226011  |
| 7                | 16               | 0              | 0.000000                | -1.578066 | 1.527303  |
| 8                | 16               | 0              | 0.000000                | 1.578066  | 1.527303  |
| 9                | 1                | 0              | 0.000000                | -1.252063 | -6.226011 |
| 10               | 6                | 0              | 0.000000                | -0.689014 | -5.297961 |
| 11               | 6                | 0              | 0.000000                | 0.689014  | -5.297961 |
| 12               | 1                | 0              | 0.000000                | 1.252063  | -6.226011 |
| 13               | 6                | 0              | 0.000000                | -0.709351 | -3.033419 |
| 14               | 6                | 0              | 0.000000                | 0.709351  | -3.033419 |
| 15               | 16               | 0              | 0.000000                | -1.578066 | -1.527303 |
| 16               | 16               | 0              | 0.000000                | 1.578066  | -1.527303 |
| 17               | 29               | 0              | 0.000000                | 0.000000  | 0.000000  |
| 18               | 7                | 0              | 0.000000                | -1.392840 | 4.162637  |
| 19               | 7                | 0              | 0.000000                | 1.392840  | 4.162637  |
| 20               | 7                | 0              | 0.000000                | -1.392840 | -4.162637 |
| 21               | 7                | 0              | 0.000000                | 1.392840  | -4.162637 |

---

**[Cu(pdt)<sub>2</sub>]<sup>2-</sup>**      E(au)=-3758.47762      PBE1PBE/6-311++G(2df,2p)

---

| Center Number | Atomic Number | Atomic Type | Coordinates (Angstroms) |           |           |
|---------------|---------------|-------------|-------------------------|-----------|-----------|
|               |               |             | X                       | Y         | Z         |
| 1             | 6             | 0           | 0.000000                | 0.687086  | 5.414758  |
| 2             | 6             | 0           | 0.000000                | 0.723981  | 3.129573  |
| 3             | 6             | 0           | 0.000000                | -0.723981 | 3.129573  |
| 4             | 6             | 0           | 0.000000                | -0.687086 | 5.414758  |
| 5             | 1             | 0           | 0.000000                | 1.250066  | 6.346813  |
| 6             | 1             | 0           | 0.000000                | -1.250066 | 6.346813  |
| 7             | 16            | 0           | 0.000000                | -1.615252 | 1.648666  |
| 8             | 16            | 0           | 0.000000                | 1.615252  | 1.648666  |
| 9             | 1             | 0           | 0.000000                | -1.250066 | -6.346813 |
| 10            | 6             | 0           | 0.000000                | -0.687086 | -5.414758 |
| 11            | 6             | 0           | 0.000000                | 0.687086  | -5.414758 |
| 12            | 1             | 0           | 0.000000                | 1.250066  | -6.346813 |
| 13            | 6             | 0           | 0.000000                | -0.723981 | -3.129573 |
| 14            | 6             | 0           | 0.000000                | 0.723981  | -3.129573 |
| 15            | 16            | 0           | 0.000000                | -1.615252 | -1.648666 |
| 16            | 16            | 0           | 0.000000                | 1.615252  | -1.648666 |
| 17            | 29            | 0           | 0.000000                | 0.000000  | 0.000000  |
| 18            | 7             | 0           | 0.000000                | -1.392269 | 4.278905  |
| 19            | 7             | 0           | 0.000000                | 1.392269  | 4.278905  |
| 20            | 7             | 0           | 0.000000                | -1.392269 | -4.278905 |
| 21            | 7             | 0           | 0.000000                | 1.392269  | -4.278905 |

---

**[Cu(pds)<sub>2</sub>]<sup>0</sup>**      E(au)=-11771.02915      PBE1PBE/6-311++G(2df,2p)

---

| Center Number | Atomic Number | Atomic Type | Coordinates (Angstroms) |           |           |
|---------------|---------------|-------------|-------------------------|-----------|-----------|
|               |               |             | X                       | Y         | Z         |
| 1             | 6             | 0           | 0.000000                | 0.697895  | 5.425310  |
| 2             | 6             | 0           | 0.000000                | 0.705554  | 3.165188  |
| 3             | 6             | 0           | 0.000000                | -0.705554 | 3.165188  |
| 4             | 6             | 0           | 0.000000                | -0.697895 | 5.425310  |
| 5             | 1             | 0           | 0.000000                | 1.257832  | 6.354022  |
| 6             | 1             | 0           | 0.000000                | -1.257832 | 6.354022  |
| 7             | 1             | 0           | 0.000000                | -1.257832 | -6.354022 |
| 8             | 6             | 0           | 0.000000                | -0.697895 | -5.425310 |
| 9             | 6             | 0           | 0.000000                | 0.697895  | -5.425310 |
| 10            | 1             | 0           | 0.000000                | 1.257832  | -6.354022 |
| 11            | 6             | 0           | 0.000000                | -0.705554 | -3.165188 |
| 12            | 6             | 0           | 0.000000                | 0.705554  | -3.165188 |
| 13            | 7             | 0           | 0.000000                | -1.391898 | 4.300750  |
| 14            | 7             | 0           | 0.000000                | 1.391898  | 4.300750  |
| 15            | 7             | 0           | 0.000000                | -1.391898 | -4.300750 |
| 16            | 7             | 0           | 0.000000                | 1.391898  | -4.300750 |
| 17            | 34            | 0           | 0.000000                | -1.685779 | 1.571458  |
| 18            | 34            | 0           | 0.000000                | 1.685779  | 1.571458  |
| 19            | 34            | 0           | 0.000000                | -1.685779 | -1.571458 |
| 20            | 34            | 0           | 0.000000                | 1.685779  | -1.571458 |
| 21            | 29            | 0           | 0.000000                | 0.000000  | 0.000000  |

---



**[Cu(pds)<sub>2</sub>]<sup>1-</sup>**      E(au)=-11771.17091      PBE1PBE/6-311++G(2df,2p)

| Center<br>Number | Atomic<br>Number | Atomic<br>Type | Coordinates (Angstroms) |           |           |
|------------------|------------------|----------------|-------------------------|-----------|-----------|
|                  |                  |                | X                       | Y         | Z         |
| 1                | 6                | 0              | 0.000000                | 0.689069  | 5.497811  |
| 2                | 6                | 0              | 0.000000                | 0.707432  | 3.231258  |
| 3                | 6                | 0              | 0.000000                | -0.707432 | 3.231258  |
| 4                | 6                | 0              | 0.000000                | -0.689069 | 5.497811  |
| 5                | 1                | 0              | 0.000000                | 1.254107  | 6.424742  |
| 6                | 1                | 0              | 0.000000                | -1.254107 | 6.424742  |
| 7                | 1                | 0              | 0.000000                | -1.254107 | -6.424742 |
| 8                | 6                | 0              | 0.000000                | -0.689069 | -5.497811 |
| 9                | 6                | 0              | 0.000000                | 0.689069  | -5.497811 |
| 10               | 1                | 0              | 0.000000                | 1.254107  | -6.424742 |
| 11               | 6                | 0              | 0.000000                | -0.707432 | -3.231258 |
| 12               | 6                | 0              | 0.000000                | 0.707432  | -3.231258 |
| 13               | 29               | 0              | 0.000000                | 0.000000  | 0.000000  |
| 14               | 7                | 0              | 0.000000                | -1.389229 | 4.360904  |
| 15               | 7                | 0              | 0.000000                | 1.389229  | 4.360904  |
| 16               | 7                | 0              | 0.000000                | -1.389229 | -4.360904 |
| 17               | 7                | 0              | 0.000000                | 1.389229  | -4.360904 |
| 18               | 34               | 0              | 0.000000                | -1.670894 | 1.612044  |
| 19               | 34               | 0              | 0.000000                | 1.670894  | 1.612044  |
| 20               | 34               | 0              | 0.000000                | -1.670894 | -1.612044 |
| 21               | 34               | 0              | 0.000000                | 1.670894  | -1.612044 |

**[Cu(pds)<sub>2</sub>]<sup>2-</sup>**      E(au)=-11771.14629      PBE1PBE/6-311++G(2df,2p)

| Center<br>Number | Atomic<br>Number | Atomic<br>Type | Coordinates (Angstroms) |           |           |
|------------------|------------------|----------------|-------------------------|-----------|-----------|
|                  |                  |                | X                       | Y         | Z         |
| 1                | 6                | 0              | 0.000000                | 0.687726  | 5.613478  |
| 2                | 6                | 0              | 0.000000                | 0.719652  | 3.330099  |
| 3                | 6                | 0              | 0.000000                | -0.719652 | 3.330099  |
| 4                | 6                | 0              | 0.000000                | -0.687726 | 5.613478  |
| 5                | 1                | 0              | 0.000000                | 1.252606  | 6.544017  |
| 6                | 1                | 0              | 0.000000                | -1.252606 | 6.544017  |
| 7                | 1                | 0              | 0.000000                | -1.252606 | -6.544017 |
| 8                | 6                | 0              | 0.000000                | -0.687726 | -5.613478 |
| 9                | 6                | 0              | 0.000000                | 0.687726  | -5.613478 |
| 10               | 1                | 0              | 0.000000                | 1.252606  | -6.544017 |
| 11               | 6                | 0              | 0.000000                | -0.719652 | -3.330099 |
| 12               | 6                | 0              | 0.000000                | 0.719652  | -3.330099 |
| 13               | 7                | 0              | 0.000000                | -1.388786 | 4.476824  |
| 14               | 7                | 0              | 0.000000                | 1.388786  | 4.476824  |
| 15               | 7                | 0              | 0.000000                | -1.388786 | -4.476824 |
| 16               | 7                | 0              | 0.000000                | 1.388786  | -4.476824 |
| 17               | 34               | 0              | 0.000000                | -1.708805 | 1.731166  |
| 18               | 34               | 0              | 0.000000                | 1.708805  | 1.731166  |
| 19               | 34               | 0              | 0.000000                | -1.708805 | -1.731166 |
| 20               | 34               | 0              | 0.000000                | 1.708805  | -1.731166 |
| 21               | 29               | 0              | 0.000000                | 0.000000  | 0.000000  |

**[Au(pdt)<sub>2</sub>]<sup>0</sup>**      E(au)=-2253.35434      PBE1PBE/SDD

---

| Center Number | Atomic Number | Atomic Type | Coordinates (Angstroms) |           |           |
|---------------|---------------|-------------|-------------------------|-----------|-----------|
|               |               |             | X                       | Y         | Z         |
| 1             | 6             | 0           | 0.000000                | 0.706464  | 5.469083  |
| 2             | 6             | 0           | 0.000000                | 0.711813  | 3.159990  |
| 3             | 6             | 0           | 0.000000                | -0.711813 | 3.159990  |
| 4             | 6             | 0           | 0.000000                | -0.706464 | 5.469083  |
| 5             | 1             | 0           | 0.000000                | 1.275159  | 6.391854  |
| 6             | 1             | 0           | 0.000000                | -1.275159 | 6.391854  |
| 7             | 16            | 0           | 0.000000                | -1.693837 | 1.671869  |
| 8             | 16            | 0           | 0.000000                | 1.693837  | 1.671869  |
| 9             | 1             | 0           | 0.000000                | -1.275159 | -6.391854 |
| 10            | 6             | 0           | 0.000000                | -0.706464 | -5.469083 |
| 11            | 6             | 0           | 0.000000                | 0.706464  | -5.469083 |
| 12            | 1             | 0           | 0.000000                | 1.275159  | -6.391854 |
| 13            | 6             | 0           | 0.000000                | -0.711813 | -3.159990 |
| 14            | 6             | 0           | 0.000000                | 0.711813  | -3.159990 |
| 15            | 16            | 0           | 0.000000                | -1.693837 | -1.671869 |
| 16            | 16            | 0           | 0.000000                | 1.693837  | -1.671869 |
| 17            | 79            | 0           | 0.000000                | 0.000000  | 0.000000  |
| 18            | 7             | 0           | 0.000000                | 1.402637  | 4.321071  |
| 19            | 7             | 0           | 0.000000                | -1.402637 | 4.321071  |
| 20            | 7             | 0           | 0.000000                | 1.402637  | -4.321071 |
| 21            | 7             | 0           | 0.000000                | -1.402637 | -4.321071 |

---

**[Au(pdt)<sub>2</sub>]<sup>1-</sup>**      E(au)=-2253.51142      PBE1PBE/SDD

---

| Center Number | Atomic Number | Atomic Type | Coordinates (Angstroms) |           |           |
|---------------|---------------|-------------|-------------------------|-----------|-----------|
|               |               |             | X                       | Y         | Z         |
| 1             | 6             | 0           | 0.000000                | -0.698434 | 5.519443  |
| 2             | 6             | 0           | 0.000000                | -0.714568 | 3.203118  |
| 3             | 6             | 0           | 0.000000                | 0.714568  | 3.203118  |
| 4             | 6             | 0           | 0.000000                | 0.698434  | 5.519443  |
| 5             | 1             | 0           | 0.000000                | -1.273658 | 6.439519  |
| 6             | 1             | 0           | 0.000000                | 1.273658  | 6.439519  |
| 7             | 16            | 0           | 0.000000                | 1.691266  | 1.697681  |
| 8             | 16            | 0           | 0.000000                | -1.691266 | 1.697681  |
| 9             | 1             | 0           | 0.000000                | 1.273658  | -6.439519 |
| 10            | 6             | 0           | 0.000000                | 0.698434  | -5.519443 |
| 11            | 6             | 0           | 0.000000                | -0.698434 | -5.519443 |
| 12            | 1             | 0           | 0.000000                | -1.273658 | -6.439519 |
| 13            | 6             | 0           | 0.000000                | 0.714568  | -3.203118 |
| 14            | 6             | 0           | 0.000000                | -0.714568 | -3.203118 |
| 15            | 16            | 0           | 0.000000                | 1.691266  | -1.697681 |
| 16            | 16            | 0           | 0.000000                | -1.691266 | -1.697681 |
| 17            | 79            | 0           | 0.000000                | 0.000000  | 0.000000  |
| 18            | 7             | 0           | 0.000000                | -1.400081 | 4.360353  |
| 19            | 7             | 0           | 0.000000                | 1.400081  | 4.360353  |
| 20            | 7             | 0           | 0.000000                | -1.400081 | -4.360353 |
| 21            | 7             | 0           | 0.000000                | 1.400081  | -4.360353 |

---

**[Au(pdt)<sub>2</sub>]<sup>2-</sup>**      E(au) = -2253.47544      PBE1PBE/SDD

---

| Center Number | Atomic Number | Atomic Type | Coordinates (Angstroms) |           |           |
|---------------|---------------|-------------|-------------------------|-----------|-----------|
|               |               |             | X                       | Y         | Z         |
| 1             | 6             | 0           | 0.000000                | 0.696536  | 5.682174  |
| 2             | 6             | 0           | 0.000000                | 0.727581  | 3.346822  |
| 3             | 6             | 0           | 0.000000                | -0.727581 | 3.346822  |
| 4             | 6             | 0           | 0.000000                | -0.696536 | 5.682174  |
| 5             | 1             | 0           | 0.000000                | 1.274073  | 6.604407  |
| 6             | 1             | 0           | 0.000000                | -1.274073 | 6.604407  |
| 7             | 16            | 0           | 0.000000                | -1.710350 | 1.861538  |
| 8             | 16            | 0           | 0.000000                | 1.710350  | 1.861538  |
| 9             | 1             | 0           | 0.000000                | -1.274073 | -6.604407 |
| 10            | 6             | 0           | 0.000000                | -0.696536 | -5.682174 |
| 11            | 6             | 0           | 0.000000                | 0.696536  | -5.682174 |
| 12            | 1             | 0           | 0.000000                | 1.274073  | -6.604407 |
| 13            | 6             | 0           | 0.000000                | -0.727581 | -3.346822 |
| 14            | 6             | 0           | 0.000000                | 0.727581  | -3.346822 |
| 15            | 16            | 0           | 0.000000                | -1.710350 | -1.861538 |
| 16            | 16            | 0           | 0.000000                | 1.710350  | -1.861538 |
| 17            | 79            | 0           | 0.000000                | 0.000000  | 0.000000  |
| 18            | 7             | 0           | 0.000000                | 1.401678  | 4.521957  |
| 19            | 7             | 0           | 0.000000                | -1.401678 | 4.521957  |
| 20            | 7             | 0           | 0.000000                | 1.401678  | -4.521957 |
| 21            | 7             | 0           | 0.000000                | -1.401678 | -4.521957 |

---

**[Au(pds)<sub>2</sub>]<sup>0</sup>**      E(au)=-698.71854      PBE1PBE/SDD

---

| Center Number | Atomic Number | Atomic Type | Coordinates (Angstroms) |           |           |
|---------------|---------------|-------------|-------------------------|-----------|-----------|
|               |               |             | X                       | Y         | Z         |
| 1             | 6             | 0           | 0.000000                | 0.705645  | 5.618675  |
| 2             | 6             | 0           | 0.000000                | 0.711598  | 3.304244  |
| 3             | 6             | 0           | 0.000000                | -0.711598 | 3.304244  |
| 4             | 6             | 0           | 0.000000                | -0.705645 | 5.618675  |
| 5             | 1             | 0           | 0.000000                | 1.275279  | 6.540814  |
| 6             | 1             | 0           | 0.000000                | -1.275279 | 6.540814  |
| 7             | 1             | 0           | 0.000000                | -1.275279 | -6.540814 |
| 8             | 6             | 0           | 0.000000                | -0.705645 | -5.618675 |
| 9             | 6             | 0           | 0.000000                | 0.705645  | -5.618675 |
| 10            | 1             | 0           | 0.000000                | 1.275279  | -6.540814 |
| 11            | 6             | 0           | 0.000000                | -0.711598 | -3.304244 |
| 12            | 6             | 0           | 0.000000                | 0.711598  | -3.304244 |
| 13            | 79            | 0           | 0.000000                | 0.000000  | 0.000000  |
| 14            | 7             | 0           | 0.000000                | 1.401289  | 4.468586  |
| 15            | 7             | 0           | 0.000000                | -1.401289 | 4.468586  |
| 16            | 7             | 0           | 0.000000                | 1.401289  | -4.468586 |
| 17            | 7             | 0           | 0.000000                | -1.401289 | -4.468586 |
| 18            | 34            | 0           | 0.000000                | 1.784012  | 1.728067  |
| 19            | 34            | 0           | 0.000000                | -1.784012 | 1.728067  |
| 20            | 34            | 0           | 0.000000                | -1.784012 | -1.728067 |
| 21            | 34            | 0           | 0.000000                | 1.784012  | -1.728067 |

---

**[Au(pds)<sub>2</sub>]<sup>1-</sup>**      E(au)=-698.86542      PBE1PBE/SDD

---

| Center Number | Atomic Number | Atomic Type | Coordinates (Angstroms) |           |           |
|---------------|---------------|-------------|-------------------------|-----------|-----------|
|               |               |             | X                       | Y         | Z         |
| 1             | 6             | 0           | 0.000000                | 0.699004  | 5.677492  |
| 2             | 6             | 0           | 0.000000                | 0.715143  | 3.357456  |
| 3             | 6             | 0           | 0.000000                | -0.715143 | 3.357456  |
| 4             | 6             | 0           | 0.000000                | -0.699004 | 5.677492  |
| 5             | 1             | 0           | 0.000000                | 1.273480  | 6.597933  |
| 6             | 1             | 0           | 0.000000                | -1.273480 | 6.597933  |
| 7             | 1             | 0           | 0.000000                | -1.273480 | -6.597933 |
| 8             | 6             | 0           | 0.000000                | -0.699004 | -5.677492 |
| 9             | 6             | 0           | 0.000000                | 0.699004  | -5.677492 |
| 10            | 1             | 0           | 0.000000                | 1.273480  | -6.597933 |
| 11            | 6             | 0           | 0.000000                | -0.715143 | -3.357456 |
| 12            | 6             | 0           | 0.000000                | 0.715143  | -3.357456 |
| 13            | 79            | 0           | 0.000000                | 0.000000  | 0.000000  |
| 14            | 7             | 0           | 0.000000                | 1.400289  | 4.518085  |
| 15            | 7             | 0           | 0.000000                | -1.400289 | 4.518085  |
| 16            | 7             | 0           | 0.000000                | 1.400289  | -4.518085 |
| 17            | 7             | 0           | 0.000000                | -1.400289 | -4.518085 |
| 18            | 34            | 0           | 0.000000                | 1.777144  | 1.759873  |
| 19            | 34            | 0           | 0.000000                | -1.777144 | 1.759873  |
| 20            | 34            | 0           | 0.000000                | -1.777144 | -1.759873 |
| 21            | 34            | 0           | 0.000000                | 1.777144  | -1.759873 |

---

**[Au(pds)<sub>2</sub>]<sup>2-</sup>**      E(au)=-698.82525      PBE1PBE/SDD

---

| Center Number | Atomic Number | Atomic Type | Coordinates (Angstroms) |           |           |
|---------------|---------------|-------------|-------------------------|-----------|-----------|
|               |               |             | X                       | Y         | Z         |
| 1             | 6             | 0           | 0.000000                | 0.697389  | 5.827155  |
| 2             | 6             | 0           | 0.000000                | 0.726412  | 3.490887  |
| 3             | 6             | 0           | 0.000000                | -0.726412 | 3.490887  |
| 4             | 6             | 0           | 0.000000                | -0.697389 | 5.827155  |
| 5             | 1             | 0           | 0.000000                | 1.273921  | 6.749455  |
| 6             | 1             | 0           | 0.000000                | -1.273921 | 6.749455  |
| 7             | 1             | 0           | 0.000000                | -1.273921 | -6.749455 |
| 8             | 6             | 0           | 0.000000                | -0.697389 | -5.827155 |
| 9             | 6             | 0           | 0.000000                | 0.697389  | -5.827155 |
| 10            | 1             | 0           | 0.000000                | 1.273921  | -6.749455 |
| 11            | 6             | 0           | 0.000000                | -0.726412 | -3.490887 |
| 12            | 6             | 0           | 0.000000                | 0.726412  | -3.490887 |
| 13            | 79            | 0           | 0.000000                | 0.000000  | 0.000000  |
| 14            | 7             | 0           | 0.000000                | 1.401332  | 4.667244  |
| 15            | 7             | 0           | 0.000000                | -1.401332 | 4.667244  |
| 16            | 7             | 0           | 0.000000                | 1.401332  | -4.667244 |
| 17            | 7             | 0           | 0.000000                | -1.401332 | -4.667244 |
| 18            | 34            | 0           | 0.000000                | 1.798219  | 1.904825  |
| 19            | 34            | 0           | 0.000000                | -1.798219 | 1.904825  |
| 20            | 34            | 0           | 0.000000                | -1.798219 | -1.904825 |
| 21            | 34            | 0           | 0.000000                | 1.798219  | -1.904825 |

---

**[Au(pdt)<sub>2</sub>]<sup>0</sup>** E(au)=-2253.74970 PBE1PBE// 6-311++G(2df,2p)for C N H S (Se),  
(aug-cc-pVTZ-PP) for Au

| Center<br>Number | Atomic<br>Number | Atomic<br>Type | Coordinates (Angstroms) |           |           |
|------------------|------------------|----------------|-------------------------|-----------|-----------|
|                  |                  |                | X                       | Y         | Z         |
| 1                | 6                | 0              | 0.000000                | 0.702302  | 5.346054  |
| 2                | 6                | 0              | 0.000000                | 0.710899  | 3.075981  |
| 3                | 6                | 0              | 0.000000                | -0.710899 | 3.075981  |
| 4                | 6                | 0              | 0.000000                | -0.702302 | 5.346054  |
| 5                | 1                | 0              | 0.000000                | 1.262690  | 6.277825  |
| 6                | 1                | 0              | 0.000000                | -1.262690 | 6.277825  |
| 7                | 1                | 0              | 0.000000                | -1.262690 | -6.277825 |
| 8                | 6                | 0              | 0.000000                | -0.702302 | -5.346054 |
| 9                | 6                | 0              | 0.000000                | 0.702302  | -5.346054 |
| 10               | 1                | 0              | 0.000000                | 1.262690  | -6.277825 |
| 11               | 6                | 0              | 0.000000                | -0.710899 | -3.075981 |
| 12               | 6                | 0              | 0.000000                | 0.710899  | -3.075981 |
| 13               | 79               | 0              | 0.000000                | 0.000000  | 0.000000  |
| 14               | 7                | 0              | 0.000000                | 1.401544  | 4.221744  |
| 15               | 7                | 0              | 0.000000                | -1.401544 | 4.221744  |
| 16               | 7                | 0              | 0.000000                | 1.401544  | -4.221744 |
| 17               | 7                | 0              | 0.000000                | -1.401544 | -4.221744 |
| 18               | 16               | 0              | 0.000000                | 1.641415  | 1.622330  |
| 19               | 16               | 0              | 0.000000                | -1.641415 | 1.622330  |
| 20               | 16               | 0              | 0.000000                | -1.641415 | -1.622330 |
| 21               | 16               | 0              | 0.000000                | 1.641415  | -1.622330 |

**[Au(pdt)<sub>2</sub>]<sup>-1</sup>** E(au)=-2253.89147 PBE1PBE// 6-311++G(2df,2p)for C N H S (Se),  
(aug-cc-pVTZ-PP) for Au

| Center<br>Number | Atomic<br>Number | Atomic<br>Type | Coordinates (Angstroms) |           |           |
|------------------|------------------|----------------|-------------------------|-----------|-----------|
|                  |                  |                | X                       | Y         | Z         |
| 1                | 6                | 0              | 0.000000                | 0.692957  | 5.400228  |
| 2                | 6                | 0              | 0.000000                | 0.713641  | 3.121386  |
| 3                | 6                | 0              | 0.000000                | -0.713641 | 3.121386  |
| 4                | 6                | 0              | 0.000000                | -0.692957 | 5.400228  |
| 5                | 1                | 0              | 0.000000                | 1.260618  | 6.328822  |
| 6                | 1                | 0              | 0.000000                | -1.260618 | 6.328822  |
| 7                | 1                | 0              | 0.000000                | -1.260618 | -6.328822 |
| 8                | 6                | 0              | 0.000000                | -0.692957 | -5.400228 |
| 9                | 6                | 0              | 0.000000                | 0.692957  | -5.400228 |
| 10               | 1                | 0              | 0.000000                | 1.260618  | -6.328822 |
| 11               | 6                | 0              | 0.000000                | -0.713641 | -3.121386 |
| 12               | 6                | 0              | 0.000000                | 0.713641  | -3.121386 |
| 13               | 79               | 0              | 0.000000                | 0.000000  | 0.000000  |
| 14               | 7                | 0              | 0.000000                | 1.396468  | 4.261851  |
| 15               | 7                | 0              | 0.000000                | -1.396468 | 4.261851  |
| 16               | 7                | 0              | 0.000000                | 1.396468  | -4.261851 |
| 17               | 7                | 0              | 0.000000                | -1.396468 | -4.261851 |
| 18               | 16               | 0              | 0.000000                | 1.642623  | 1.648212  |
| 19               | 16               | 0              | 0.000000                | -1.642623 | 1.648212  |
| 20               | 16               | 0              | 0.000000                | -1.642623 | -1.648212 |
| 21               | 16               | 0              | 0.000000                | 1.642623  | -1.648212 |

**[Au(pdt)<sub>2</sub>]<sup>-2</sup>** E(au)=-2253.83627 PBE1PBE// 6-311++G(2df,2p)for C N H S (Se),  
 (aug-cc-pVTZ-PP) for Au

| Center<br>Number | Atomic<br>Number | Atomic<br>Type | Coordinates (Angstroms) |           |           |
|------------------|------------------|----------------|-------------------------|-----------|-----------|
|                  |                  |                | X                       | Y         | Z         |
| 1                | 6                | 0              | 0.000000                | 0.691249  | 5.551927  |
| 2                | 6                | 0              | 0.000000                | 0.727354  | 3.253942  |
| 3                | 6                | 0              | 0.000000                | -0.727354 | 3.253942  |
| 4                | 6                | 0              | 0.000000                | -0.691249 | 5.551927  |
| 5                | 1                | 0              | 0.000000                | 1.259792  | 6.483841  |
| 6                | 1                | 0              | 0.000000                | -1.259792 | 6.483841  |
| 7                | 1                | 0              | 0.000000                | -1.259792 | -6.483841 |
| 8                | 6                | 0              | 0.000000                | -0.691249 | -5.551927 |
| 9                | 6                | 0              | 0.000000                | 0.691249  | -5.551927 |
| 10               | 1                | 0              | 0.000000                | 1.259792  | -6.483841 |
| 11               | 6                | 0              | 0.000000                | -0.727354 | -3.253942 |
| 12               | 6                | 0              | 0.000000                | 0.727354  | -3.253942 |
| 13               | 79               | 0              | 0.000000                | 0.000000  | 0.000000  |
| 14               | 7                | 0              | 0.000000                | 1.396254  | 4.412786  |
| 15               | 7                | 0              | 0.000000                | -1.396254 | 4.412786  |
| 16               | 7                | 0              | 0.000000                | 1.396254  | -4.412786 |
| 17               | 7                | 0              | 0.000000                | -1.396254 | -4.412786 |
| 18               | 16               | 0              | 0.000000                | 1.667164  | 1.800459  |
| 19               | 16               | 0              | 0.000000                | -1.667164 | 1.800459  |
| 20               | 16               | 0              | 0.000000                | -1.667164 | -1.800459 |
| 21               | 16               | 0              | 0.000000                | 1.667164  | -1.800459 |

**[Au(pds)<sub>2</sub>]<sup>0</sup>** E(au)=-10266.55149 PBE1PBE// 6-311++G(2df,2p)for C N H S (Se),  
 (aug-cc-pVTZ-PP) for Au

| Center<br>Number | Atomic<br>Number | Atomic<br>Type | Coordinates (Angstroms) |           |           |
|------------------|------------------|----------------|-------------------------|-----------|-----------|
|                  |                  |                | X                       | Y         | Z         |
| 1                | 6                | 0              | 0.000000                | 0.697869  | 5.518981  |
| 2                | 6                | 0              | 0.000000                | 0.705564  | 3.254057  |
| 3                | 6                | 0              | 0.000000                | -0.705564 | 3.254057  |
| 4                | 6                | 0              | 0.000000                | -0.697869 | 5.518981  |
| 5                | 1                | 0              | 0.000000                | 1.259885  | 6.448261  |
| 6                | 1                | 0              | 0.000000                | -1.259885 | 6.448261  |
| 7                | 1                | 0              | 0.000000                | -1.259885 | -6.448261 |
| 8                | 6                | 0              | 0.000000                | -0.697869 | -5.518981 |
| 9                | 6                | 0              | 0.000000                | 0.697869  | -5.518981 |
| 10               | 1                | 0              | 0.000000                | 1.259885  | -6.448261 |
| 11               | 6                | 0              | 0.000000                | -0.705564 | -3.254057 |
| 12               | 6                | 0              | 0.000000                | 0.705564  | -3.254057 |
| 13               | 79               | 0              | 0.000000                | 0.000000  | 0.000000  |
| 14               | 7                | 0              | 0.000000                | 1.390520  | 4.394274  |
| 15               | 7                | 0              | 0.000000                | -1.390520 | 4.394274  |
| 16               | 7                | 0              | 0.000000                | 1.390520  | -4.394274 |
| 17               | 7                | 0              | 0.000000                | -1.390520 | -4.394274 |
| 18               | 34               | 0              | 0.000000                | 1.738988  | 1.690654  |
| 19               | 34               | 0              | 0.000000                | -1.738988 | 1.690654  |
| 20               | 34               | 0              | 0.000000                | -1.738988 | -1.690654 |
| 21               | 34               | 0              | 0.000000                | 1.738988  | -1.690654 |

**[Au(pds)<sub>2</sub>]<sup>-1</sup>** E(au)=-10266.70796 PBE1PBE// 6-311++G(2df,2p)for C N H S (Se),  
(aug-cc-pVTZ-PP) for Au

| Center<br>Number | Atomic<br>Number | Atomic<br>Type | Coordinates (Angstroms) |           |           |
|------------------|------------------|----------------|-------------------------|-----------|-----------|
|                  |                  |                | X                       | Y         | Z         |
| 1                | 6                | 0              | 0.000000                | 0.689338  | 5.579413  |
| 2                | 6                | 0              | 0.000000                | 0.708374  | 3.307779  |
| 3                | 6                | 0              | 0.000000                | -0.708374 | 3.307779  |
| 4                | 6                | 0              | 0.000000                | -0.689338 | 5.579413  |
| 5                | 1                | 0              | 0.000000                | 1.255596  | 6.505541  |
| 6                | 1                | 0              | 0.000000                | -1.255596 | 6.505541  |
| 7                | 1                | 0              | 0.000000                | -1.255596 | -6.505541 |
| 8                | 6                | 0              | 0.000000                | -0.689338 | -5.579413 |
| 9                | 6                | 0              | 0.000000                | 0.689338  | -5.579413 |
| 10               | 1                | 0              | 0.000000                | 1.255596  | -6.505541 |
| 11               | 6                | 0              | 0.000000                | -0.708374 | -3.307779 |
| 12               | 6                | 0              | 0.000000                | 0.708374  | -3.307779 |
| 13               | 79               | 0              | 0.000000                | 0.000000  | 0.000000  |
| 14               | 7                | 0              | 0.000000                | 1.385823  | 4.443082  |
| 15               | 7                | 0              | 0.000000                | -1.385823 | 4.443082  |
| 16               | 7                | 0              | 0.000000                | 1.385823  | -4.443082 |
| 17               | 7                | 0              | 0.000000                | -1.385823 | -4.443082 |
| 18               | 34               | 0              | 0.000000                | 1.733710  | 1.723866  |
| 19               | 34               | 0              | 0.000000                | -1.733710 | 1.723866  |
| 20               | 34               | 0              | 0.000000                | -1.733710 | -1.723866 |
| 21               | 34               | 0              | 0.000000                | 1.733710  | -1.723866 |

**[Au(pds)<sub>2</sub>]<sup>-2</sup>** E(au)=-10266.51388 PBE1PBE// 6-311++G(2df,2p)for C N H S (Se),  
(aug-cc-pVTZ-PP) for Au

| Center<br>Number | Atomic<br>Number | Atomic<br>Type | Coordinates (Angstroms) |           |           |
|------------------|------------------|----------------|-------------------------|-----------|-----------|
|                  |                  |                | X                       | Y         | Z         |
| 1                | 6                | 0              | 0.000000                | 0.691598  | 5.736096  |
| 2                | 6                | 0              | 0.000000                | 0.723066  | 3.440318  |
| 3                | 6                | 0              | 0.000000                | -0.723066 | 3.440318  |
| 4                | 6                | 0              | 0.000000                | -0.691598 | 5.736096  |
| 5                | 1                | 0              | 0.000000                | 1.261387  | 6.666816  |
| 6                | 1                | 0              | 0.000000                | -1.261387 | 6.666816  |
| 7                | 1                | 0              | 0.000000                | -1.261387 | -6.666816 |
| 8                | 6                | 0              | 0.000000                | -0.691598 | -5.736096 |
| 9                | 6                | 0              | 0.000000                | 0.691598  | -5.736096 |
| 10               | 1                | 0              | 0.000000                | 1.261387  | -6.666816 |
| 11               | 6                | 0              | 0.000000                | -0.723066 | -3.440318 |
| 12               | 6                | 0              | 0.000000                | 0.723066  | -3.440318 |
| 13               | 79               | 0              | 0.000000                | 0.000000  | 0.000000  |
| 14               | 7                | 0              | 0.000000                | 1.393656  | 4.595953  |
| 15               | 7                | 0              | 0.000000                | -1.393656 | 4.595953  |
| 16               | 7                | 0              | 0.000000                | 1.393656  | -4.595953 |
| 17               | 7                | 0              | 0.000000                | -1.393656 | -4.595953 |
| 18               | 34               | 0              | 0.000000                | 1.762797  | 1.871148  |
| 19               | 34               | 0              | 0.000000                | -1.762797 | 1.871148  |
| 20               | 34               | 0              | 0.000000                | -1.762797 | -1.871148 |
| 21               | 34               | 0              | 0.000000                | 1.762797  | -1.871148 |
